# Supplementary material for: A facile synthesis of NaYF4:Yb3+/Er3+nanoparticles with tunable multicolor upconversion luminescence properties for cell imaging
Source: Royal Society of Chemistry journal article supplement (doi:10.1039/c4ra05205f), 2014-09-04
Supplement: c4ra05205f1.pdf [file c4ra05205f1.pdf]

## Supporting Information

A facile synthesis of  $\text{NaYF}_4:\text{Yb}^{3+}/\text{Er}^{3+}$  nanoparticles with tunable  
multicolor upconversion luminescence properties for cell imaging

Yueli Hu<sup>1,2</sup>, Yuxiu Sun<sup>1,2\*</sup>, Yan Li<sup>1,2\*</sup>, Shaokai Sun<sup>3</sup>, Jianzhong Huo<sup>1</sup>, Xiaojun Zhao<sup>1</sup>

<sup>1</sup> Key Laboratory of Inorganic-Organic Hybrid Functional Material Chemistry,  
Ministry of Education, Tianjin Key Laboratory of Structure and Performance for  
Functional Molecule, College of Chemistry, Tianjin Normal University, Tianjin  
300387, P.R. China

<sup>2</sup>State Key Laboratory of Medicinal Chemical Biology, Nankai University, Tianjin  
300071, China

<sup>3</sup>School of Medical Imaging, Tianjin Medical University, Tianjin 300070, China

\*E-mail: hxxysyx@mail.tjnu.edu.cn; nkliyan@nankai.edu.cn

1  
2

3 **Fig.S1.** FTIR spectra of UCNPs, PEI, and PEI-UCNPs, inset: The Zeta potential of  
4 UCNPs and PEI-UCNPs (UCNPs and PEI-UCNPs were dispersed at the same  
5 concentration of 500  $\mu\text{g/mL}$  in PBS)

1

2 **Fig.S2.** The EDX of UCNPs (A) and PEI-UCNPs (B).

1

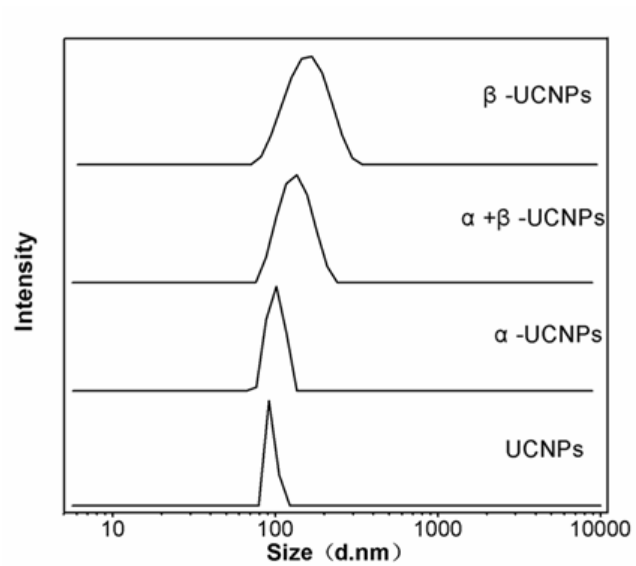

2

3 **Fig.S3.** The DLS of  $\alpha$ -UCNPs,  $\alpha + \beta$ -UCNPs, and  $\beta$ -UCNPs.

1  
2

3

4 **Fig.S4.** The fluorescence emission spectra of  $\alpha$ -UCNPs (A1),  $\alpha$ - mixed  $\beta$ -UCNPs  
5 (B1),  $\beta$ -UCNPs (C1) and the corresponding chromatic graph (A2, B2, C2).  
6

1

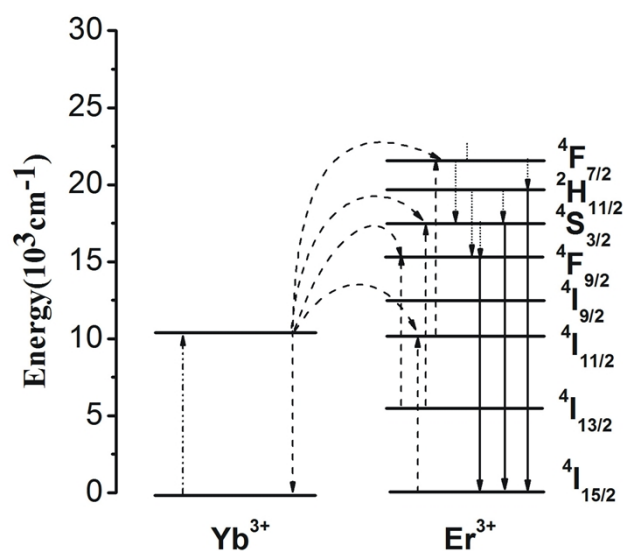

2

3

4 **Fig.S5.** Proposed energy-transfer mechanisms showing the upconversion process in  
 5  $\text{Er}^{3+}$  and  $\text{Yb}^{3+}$  doped crystals under 980 nm laser diode excitation. The dashed-dotted,  
 6 dashed, dotted, and full arrows represent excitation, energy transfer, multiphonon  
 7 relaxation, and emission processes, respectively.

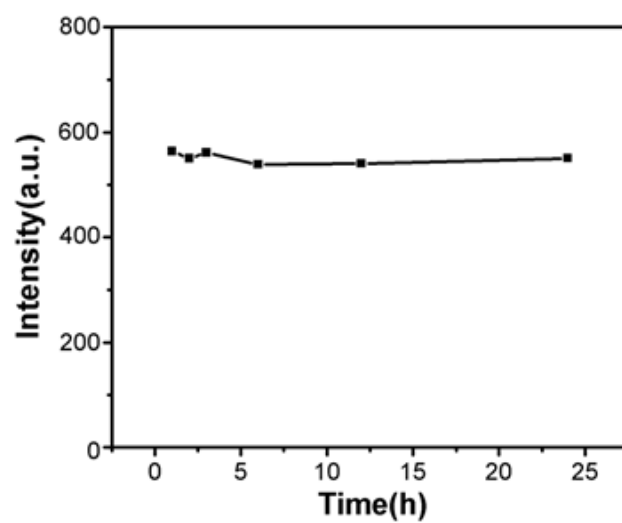

1

2 **Fig.S6.** The stability of UCNPs in PBS (500  $\mu\text{g/mL}$ , 0.6A, the intensity was the red

3 emission

at

655nm).

1

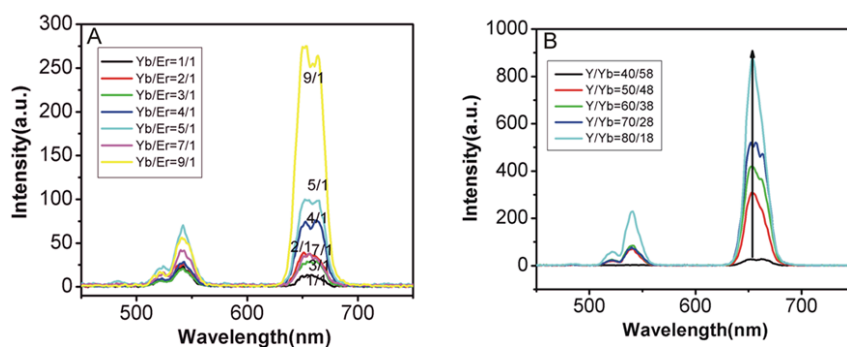

2

3

4 **Fig.S7.** The upconversion emission spectra of (A) NaYF<sub>4</sub>:Yb<sup>3+</sup>/Er<sup>3+</sup> (Yb/Er=1/1-9/1)  
 5 and (B) NaYF<sub>4</sub>:Yb<sup>3+</sup>/Er<sup>3+</sup> (Y/Yb=40/58-80/18).



1

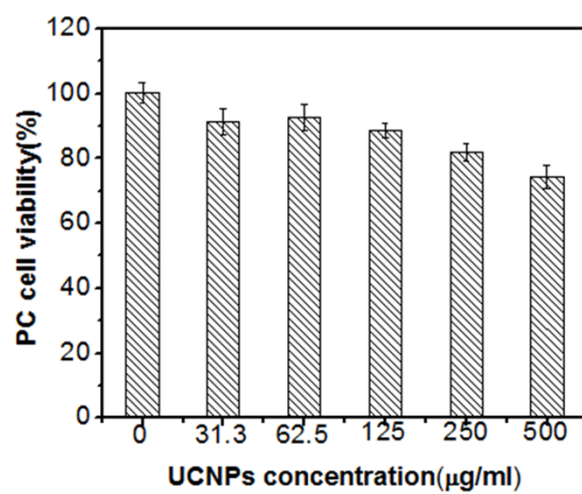

2

3

4

5 **Fig.S8.** In vitro cytotoxicity estimation of PC cells by MTT assay after incubation  
6 with PEI-UCNPs at different concentrations for 24 h. Error bars were based on three  
7 samples.

1 **Table S1** ICP-MS quantitative analysis of three sample' molar ratios of Y:Yb:Er.

| Sample         | ICP-MS tested results |       |       | The molar ratios of Y:Yb:Er |
|----------------|-----------------------|-------|-------|-----------------------------|
|                | Y                     | Yb    | Er    |                             |
| $\alpha$       | 20.05%                | 8.95% | 0.91% | 79.78%: 18.30%: 1.92%       |
| $\alpha+\beta$ | 21.10%                | 9.25% | 1.01% | 79.96%: 18.01%: 2.03%       |
| $\beta$        | 19.54%                | 8.46% | 0.89% | 80.22%: 17.84%: 1.94%       |

2
